# Supplementary material
Source: Springer Nature journal article supplement (https://www.springermedizin.de/resource/supplementary/12974_2011_495_MOESM2_ESM.pdf/9601414)

**A****outgrowth density**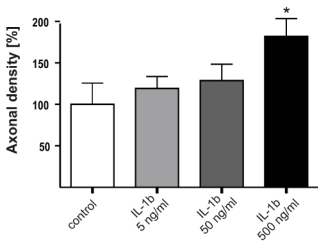**B****outgrowth length**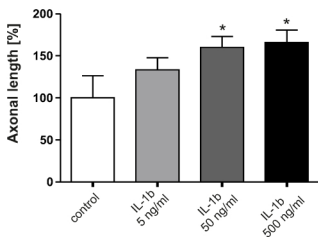**C**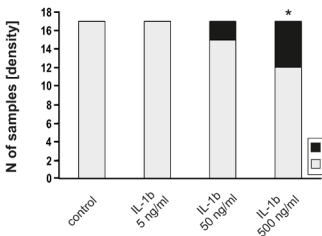**D**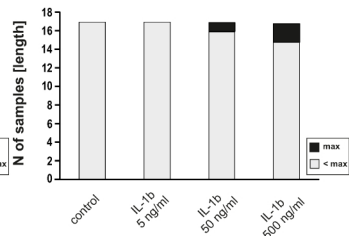**E**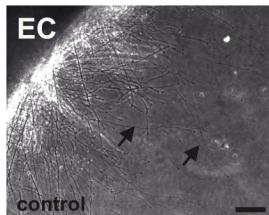**F**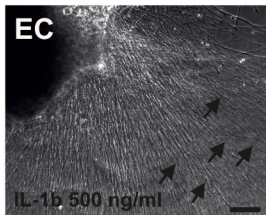

Supplement: MOESM2 [file 9601414]
